# Supplementary material for: Increased ω6-Containing Phospholipids and Primary ω6 Oxidation Products in the Brain Tissue of Rats on an ω3-Deficient Diet
Source: PubMed Central journal article supplement (PMC5082804; doi:10.1371/journal.pone.0164326), 2016-10-27
Supplement: pone.0164326.s001.pdf [file pone.0164326.s001.pdf]

## Supplementary table 1a. MRM transitions monitored for ARA-containing phospholipids

|               |               |               |               |               |               |               |               |               |               |               |               |
|---------------|---------------|---------------|---------------|---------------|---------------|---------------|---------------|---------------|---------------|---------------|---------------|
| 14:1/20:4-PG  | 739.5 / 303.3 | 14:1/20:4-PI  | 827.5 / 303.3 | 14:1/20:4-PE  | 708.5 / 303.3 | 14:1/20:4-PA  | 665.4 / 303.3 | 14:1/20:4-PS  | 752.5 / 303.3 | 14:1/20:4-PC  | 810.5 / 303.3 |
| 14:0/20:4-PG  | 741.5 / 303.3 | 14:0/20:4-PI  | 829.5 / 303.3 | 14:0/20:4-PE  | 710.5 / 303.3 | 14:0/20:4-PA  | 667.4 / 303.3 | 14:0/20:4-PS  | 754.5 / 303.3 | 14:0/20:4-PC  | 812.5 / 303.3 |
| 16:0p/20:4-PG | 753.5 / 303.3 | 16:0p/20:4-PI | 841.5 / 303.3 | 16:0p/20:4-PE | 722.5 / 303.3 | 16:0p/20:4-PA | 679.5 / 303.3 | 16:0p/20:4-PS | 766.5 / 303.3 | 16:0p/20:4-PC | 824.6 / 303.3 |
| 16:0e/20:4-PG | 755.5 / 303.3 | 16:0e/20:4-PI | 843.5 / 303.3 | 16:0e/20:4-PE | 724.5 / 303.3 | 16:0e/20:4-PA | 681.5 / 303.3 | 16:0e/20:4-PS | 768.5 / 303.3 | 16:0e/20:4-PC | 826.6 / 303.3 |
| 16:1/20:4-PG  | 767.5 / 303.3 | 16:1/20:4-PI  | 855.5 / 303.3 | 16:1/20:4-PE  | 736.5 / 303.3 | 16:1/20:4-PA  | 693.5 / 303.3 | 16:1/20:4-PS  | 780.5 / 303.3 | 16:1/20:4-PC  | 838.5 / 303.3 |
| 16:0/20:4-PG  | 769.5 / 303.3 | 16:0/20:4-PI  | 857.5 / 303.3 | 16:0/20:4-PE  | 738.5 / 303.3 | 16:0/20:4-PA  | 695.5 / 303.3 | 16:0/20:4-PS  | 782.5 / 303.3 | 16:0/20:4-PC  | 840.6 / 303.3 |
| 18:1p/20:4-PG | 779.5 / 303.3 | 18:1p/20:4-PI | 867.5 / 303.3 | 18:1p/20:4-PE | 748.5 / 303.3 | 18:1p/20:4-PA | 705.5 / 303.3 | 18:1p/20:4-PS | 792.5 / 303.3 | 18:1p/20:4-PC | 850.6 / 303.3 |
| 18:0p/20:4-PG | 781.5 / 303.3 | 18:0p/20:4-PI | 869.5 / 303.3 | 18:0p/20:4-PE | 750.5 / 303.3 | 18:0p/20:4-PA | 707.5 / 303.3 | 18:0p/20:4-PS | 794.5 / 303.3 | 18:0p/20:4-PC | 852.6 / 303.3 |
| 18:0e/20:4-PG | 783.5 / 303.3 | 18:0e/20:4-PI | 871.5 / 303.3 | 18:0e/20:4-PE | 752.5 / 303.3 | 18:0e/20:4-PA | 709.5 / 303.3 | 18:0e/20:4-PS | 796.5 / 303.3 | 18:0e/20:4-PC | 854.6 / 303.3 |
| 17:0/20:4-PG  | 783.5 / 269.2 | 17:0/20:4-PI  | 871.5 / 269.2 | 17:0/20:4-PE  | 752.5 / 269.2 | 17:0/20:4-PA  | 709.5 / 269.2 | 17:0/20:4-PS  | 796.5 / 269.2 | 17:0/20:4-PC  | 854.6 / 269.2 |
| 18:3/20:4-PG  | 791.5 / 303.3 | 18:3/20:4-PI  | 879.5 / 303.3 | 18:3/20:4-PE  | 760.5 / 303.3 | 18:3/20:4-PA  | 717.5 / 303.3 | 18:3/20:4-PS  | 804.5 / 303.3 | 18:3/20:4-PC  | 862.5 / 303.3 |
| 18:2/20:4-PG  | 793.5 / 303.3 | 18:2/20:4-PI  | 881.5 / 303.3 | 18:2/20:4-PE  | 762.5 / 303.3 | 18:2/20:4-PA  | 719.5 / 303.3 | 18:2/20:4-PS  | 806.5 / 303.3 | 18:2/20:4-PC  | 864.6 / 303.3 |
| 18:1/20:4-PG  | 795.5 / 303.3 | 18:1/20:4-PI  | 883.5 / 303.3 | 18:1/20:4-PE  | 764.5 / 303.3 | 18:1/20:4-PA  | 721.5 / 303.3 | 18:1/20:4-PS  | 808.5 / 303.3 | 18:1/20:4-PC  | 866.6 / 303.3 |
| 18:0/20:4-PG  | 797.5 / 303.3 | 18:0/20:4-PI  | 885.5 / 303.3 | 18:0/20:4-PE  | 766.5 / 303.3 | 18:0/20:4-PA  | 723.5 / 303.3 | 18:0/20:4-PS  | 810.5 / 303.3 | 18:0/20:4-PC  | 868.6 / 303.3 |
| 20:0p/20:4-PG | 809.6 / 303.3 | 20:0p/20:4-PI | 897.5 / 303.3 | 20:0p/20:4-PE | 778.6 / 303.3 | 20:0p/20:4-PA | 735.5 / 303.3 | 20:0p/20:4-PS | 822.6 / 303.3 | 20:0p/20:4-PC | 880.6 / 303.3 |
| 20:0e/20:4-PG | 811.6 / 303.3 | 20:0e/20:4-PI | 899.5 / 303.3 | 20:0e/20:4-PE | 780.6 / 303.3 | 20:0e/20:4-PA | 737.6 / 303.3 | 20:0e/20:4-PS | 824.3 / 303.3 | 20:0e/20:4-PC | 882.6 / 303.3 |
| 20:5/20:4-PG  | 815.6 / 303.3 | 20:5/20:4-PI  | 903.5 / 303.3 | 20:5/20:4-PE  | 784.6 / 303.3 | 20:5/20:4-PA  | 741.5 / 303.3 | 20:5/20:4-PS  | 828.3 / 303.3 | 20:5/20:4-PC  | 886.5 / 303.3 |
| 20:4/20:4-PG  | 817.6 / 303.3 | 20:4/20:4-PI  | 905.5 / 303.3 | 20:4/20:4-PE  | 786.5 / 303.3 | 20:4/20:4-PA  | 743.5 / 303.3 | 20:4/20:4-PS  | 830.5 / 303.3 | 20:4/20:4-PC  | 888.6 / 303.3 |
| 20:3/20:4-PG  | 819.6 / 303.3 | 20:3/20:4-PI  | 907.5 / 303.3 | 20:3/20:4-PE  | 788.5 / 303.3 | 20:3/20:4-PA  | 745.5 / 303.3 | 20:3/20:4-PS  | 832.5 / 303.3 | 20:3/20:4-PC  | 890.6 / 303.3 |
| 20:2/20:4-PG  | 821.6 / 303.3 | 20:2/20:4-PI  | 909.6 / 303.3 | 20:2/20:4-PE  | 790.5 / 303.3 | 20:2/20:4-PA  | 747.5 / 303.3 | 20:2/20:4-PS  | 834.5 / 303.3 | 20:2/20:4-PC  | 892.6 / 303.3 |
| 20:1/20:4-PG  | 823.6 / 303.3 | 20:1/20:4-PI  | 911.6 / 303.3 | 20:1/20:4-PE  | 792.6 / 303.3 | 20:1/20:4-PA  | 749.5 / 303.3 | 20:1/20:4-PS  | 836.6 / 303.3 | 20:1/20:4-PC  | 894.6 / 303.3 |
| 20:0/20:4-PG  | 825.6 / 303.3 | 20:0/20:4-PI  | 913.6 / 303.3 | 20:0/20:4-PE  | 794.6 / 303.3 | 20:0/20:4-PA  | 751.5 / 303.3 | 20:0/20:4-PS  | 838.6 / 303.3 | 20:0/20:4-PC  | 896.6 / 303.3 |
| 22:6/20:4-PG  | 841.6 / 303.3 | 22:6/20:4-PI  | 929.6 / 303.3 | 22:6/20:4-PE  | 810.5 / 303.3 | 22:6/20:4-PA  | 767.5 / 303.3 | 22:6/20:4-PS  | 854.5 / 303.3 | 22:6/20:4-PC  | 912.6 / 303.3 |
| 22:4/20:4-PG  | 845.6 / 303.3 | 22:4/20:4-PI  | 933.6 / 303.3 | 22:4/20:4-PE  | 814.5 / 303.3 | 22:4/20:4-PA  | 771.5 / 303.3 | 22:4/20:4-PS  | 858.5 / 303.3 | 22:4/20:4-PC  | 916.6 / 303.3 |
| 22:2/20:4-PG  | 849.6 / 303.3 | 22:2/20:4-PI  | 937.6 / 303.3 | 22:2/20:4-PE  | 818.6 / 303.3 | 22:2/20:4-PA  | 775.5 / 303.3 | 22:2/20:4-PS  | 862.6 / 303.3 | 22:2/20:4-PC  | 920.6 / 303.3 |
| 22:1/20:4-PG  | 851.6 / 303.3 | 22:1/20:4-PI  | 939.6 / 303.3 | 22:1/20:4-PE  | 820.6 / 303.3 | 22:1/20:4-PA  | 777.6 / 303.3 | 22:1/20:4-PS  | 864.6 / 303.3 | 22:1/20:4-PC  | 922.6 / 303.3 |
| 22:0/20:4-PG  | 853.6 / 303.3 | 22:0/20:4-PI  | 941.6 / 303.3 | 22:0/20:4-PE  | 822.6 / 303.3 | 22:0/20:4-PA  | 779.6 / 303.3 | 22:0/20:4-PS  | 866.6 / 303.3 | 22:0/20:4-PC  | 924.7 / 303.3 |

## Supplementary table 1b. MRM transitions monitored for DHA-containing phospholipids

|               |               |               |               |               |               |               |               |               |               |               |               |
|---------------|---------------|---------------|---------------|---------------|---------------|---------------|---------------|---------------|---------------|---------------|---------------|
| 14:1/22:6-PG  | 763.5 / 327.2 | 14:1/22:6-PI  | 851.5 / 327.2 | 14:1/22:6-PE  | 732.5 / 327.2 | 14:1/22:6-PA  | 689.4 / 327.2 | 14:1/22:6-PS  | 776.5 / 327.2 | 14:1/22:6-PC  | 834.5 / 327.2 |
| 14:0/22:6-PG  | 765.5 / 327.2 | 14:0/22:6-PI  | 853.5 / 327.2 | 14:0/22:6-PE  | 734.5 / 327.2 | 14:0/22:6-PA  | 691.4 / 327.2 | 14:0/22:6-PS  | 778.5 / 327.2 | 14:0/22:6-PC  | 836.5 / 327.2 |
| 16:0p/22:6-PG | 777.5 / 327.2 | 16:0p/22:6-PI | 865.5 / 327.2 | 16:0p/22:6-PE | 746.5 / 327.2 | 16:0p/22:6-PA | 703.5 / 327.2 | 16:0p/22:6-PS | 790.5 / 327.2 | 16:0p/22:6-PC | 848.6 / 327.2 |
| 16:0e/22:6-PG | 779.5 / 327.2 | 16:0e/22:6-PI | 867.5 / 327.2 | 16:0e/22:6-PE | 748.5 / 327.2 | 16:0e/22:6-PA | 705.5 / 327.2 | 16:0e/22:6-PS | 792.5 / 327.2 | 16:0e/22:6-PC | 850.6 / 327.2 |
| 16:1/22:6-PG  | 791.5 / 327.2 | 16:1/22:6-PI  | 879.5 / 327.2 | 16:1/22:6-PE  | 760.5 / 327.2 | 16:1/22:6-PA  | 717.5 / 327.2 | 16:1/22:6-PS  | 804.5 / 327.2 | 16:1/22:6-PC  | 862.5 / 327.2 |
| 16:0/22:6-PG  | 793.5 / 327.2 | 16:0/22:6-PI  | 881.5 / 327.2 | 16:0/22:6-PE  | 762.5 / 327.2 | 16:0/22:6-PA  | 719.5 / 327.2 | 16:0/22:6-PS  | 806.5 / 327.2 | 16:0/22:6-PC  | 864.6 / 327.2 |
| 18:1p/22:6-PG | 803.5 / 327.2 | 18:1p/22:6-PI | 891.5 / 327.2 | 18:1p/22:6-PE | 772.5 / 327.2 | 18:1p/22:6-PA | 729.5 / 327.2 | 18:1p/22:6-PS | 816.5 / 327.2 | 18:1p/22:6-PC | 874.6 / 327.2 |
| 18:0p/22:6-PG | 805.5 / 327.2 | 18:0p/22:6-PI | 893.5 / 327.2 | 18:0p/22:6-PE | 774.6 / 327.2 | 18:0p/22:6-PA | 731.5 / 327.2 | 18:0p/22:6-PS | 818.5 / 327.2 | 18:0p/22:6-PC | 876.6 / 327.2 |
| 18:0e/22:6-PG | 807.5 / 327.2 | 18:0e/22:6-PI | 895.6 / 327.2 | 18:0e/22:6-PE | 776.6 / 327.2 | 18:0e/22:6-PA | 733.5 / 327.2 | 18:0e/22:6-PS | 820.6 / 327.2 | 18:0e/22:6-PC | 878.6 / 327.2 |
| 18:3/22:6-PG  | 815.5 / 327.2 | 18:3/22:6-PI  | 903.5 / 327.2 | 18:3/22:6-PE  | 784.5 / 327.2 | 18:3/22:6-PA  | 741.5 / 327.2 | 18:3/22:6-PS  | 828.5 / 327.2 | 18:3/22:6-PC  | 886.5 / 327.2 |
| 18:2/22:6-PG  | 817.5 / 327.2 | 18:2/22:6-PI  | 905.5 / 327.2 | 18:2/22:6-PE  | 786.5 / 327.2 | 18:2/22:6-PA  | 743.5 / 327.2 | 18:2/22:6-PS  | 830.5 / 327.2 | 18:2/22:6-PC  | 888.6 / 327.2 |
| 18:1/22:6-PG  | 819.5 / 327.2 | 18:1/22:6-PI  | 907.5 / 327.2 | 18:1/22:6-PE  | 788.5 / 327.2 | 18:1/22:6-PA  | 745.5 / 327.2 | 18:1/22:6-PS  | 832.5 / 327.2 | 18:1/22:6-PC  | 890.6 / 327.2 |
| 18:0/22:6-PG  | 821.5 / 327.2 | 18:0/22:6-PI  | 909.5 / 327.2 | 18:0/22:6-PE  | 790.5 / 327.2 | 18:0/22:6-PA  | 747.5 / 327.2 | 18:0/22:6-PS  | 834.5 / 327.2 | 18:0/22:6-PC  | 892.6 / 327.2 |
| 20:0p/22:6-PG | 833.6 / 327.2 | 20:0p/22:6-PI | 921.5 / 327.2 | 20:0p/22:6-PE | 802.6 / 327.2 | 20:0p/22:6-PA | 759.5 / 327.2 | 20:0p/22:6-PS | 846.6 / 327.2 | 20:0p/22:6-PC | 904.6 / 327.2 |
| 20:0e/22:6-PG | 835.6 / 327.2 | 20:0e/22:6-PI | 923.6 / 327.2 | 20:0e/22:6-PE | 804.6 / 327.2 | 20:0e/22:6-PA | 761.6 / 327.2 | 20:0e/22:6-PS | 848.6 / 327.2 | 20:0e/22:6-PC | 906.6 / 327.2 |
| 20:5/22:6-PG  | 839.6 / 327.2 | 20:5/22:6-PI  | 927.5 / 327.2 | 20:5/22:6-PE  | 808.5 / 327.2 | 20:5/22:6-PA  | 765.5 / 327.2 | 20:5/22:6-PS  | 852.5 / 327.2 | 20:5/22:6-PC  | 910.5 / 327.2 |
| 20:4/22:6-PG  | 841.6 / 327.2 | 20:4/22:6-PI  | 929.5 / 327.2 | 20:4/22:6-PE  | 810.5 / 327.2 | 20:4/22:6-PA  | 767.5 / 327.2 | 20:4/22:6-PS  | 854.5 / 327.2 | 20:4/22:6-PC  | 912.6 / 327.2 |
| 20:3/22:6-PG  | 843.6 / 327.2 | 20:3/22:6-PI  | 931.5 / 327.2 | 20:3/22:6-PE  | 812.5 / 327.2 | 20:3/22:6-PA  | 769.5 / 327.2 | 20:3/22:6-PS  | 856.5 / 327.2 | 20:3/22:6-PC  | 914.6 / 327.2 |
| 20:2/22:6-PG  | 845.6 / 327.2 | 20:2/22:6-PI  | 933.6 / 327.2 | 20:2/22:6-PE  | 814.5 / 327.2 | 20:2/22:6-PA  | 771.5 / 327.2 | 20:2/22:6-PS  | 858.5 / 327.2 | 20:2/22:6-PC  | 916.6 / 327.2 |
| 20:1/22:6-PG  | 847.6 / 327.2 | 20:1/22:6-PI  | 935.6 / 327.2 | 20:1/22:6-PE  | 816.6 / 327.2 | 20:1/22:6-PA  | 773.5 / 327.2 | 20:1/22:6-PS  | 860.6 / 327.2 | 20:1/22:6-PC  | 918.6 / 327.2 |
| 20:0/22:6-PG  | 849.6 / 327.2 | 20:0/22:6-PI  | 937.6 / 327.2 | 20:0/22:6-PE  | 818.6 / 327.2 | 20:0/22:6-PA  | 775.5 / 327.2 | 20:0/22:6-PS  | 862.6 / 327.2 | 20:0/22:6-PC  | 920.6 / 327.2 |
| 22:0e/22:6-PG | 863.6 / 327.2 | 22:0e/22:6-PI | 951.5 / 327.2 | 22:0e/22:6-PE | 832.5 / 327.2 | 22:0e/22:6-PA | 789.5 / 327.2 | 22:0e/22:6-PS | 876.5 / 327.2 | 22:0e/22:6-PC | 934.6 / 327.2 |
| 21:0/22:6-PG  | 863.6 / 325.2 | 21:0/22:6-PI  | 951.5 / 325.2 | 21:0/22:6-PE  | 832.5 / 325.2 | 21:0/22:6-PA  | 789.5 / 325.2 | 21:0/22:6-PS  | 876.5 / 325.2 | 21:0/22:6-PC  | 934.6 / 325.2 |
| 22:6/22:6-PG  | 865.6 / 327.2 | 22:6/22:6-PI  | 953.5 / 327.2 | 22:6/22:6-PE  | 834.5 / 327.2 | 22:6/22:6-PA  | 791.5 / 327.2 | 22:6/22:6-PS  | 878.5 / 327.2 | 22:6/22:6-PC  | 936.6 / 327.2 |
| 22:4/22:6-PG  | 869.6 / 327.2 | 22:4/22:6-PI  | 957.6 / 327.2 | 22:4/22:6-PE  | 838.5 / 327.2 | 22:4/22:6-PA  | 795.5 / 327.2 | 22:4/22:6-PS  | 882.5 / 327.2 | 22:4/22:6-PC  | 940.6 / 327.2 |
| 22:2/22:6-PG  | 873.6 / 327.2 | 22:2/22:6-PI  | 961.6 / 327.2 | 22:2/22:6-PE  | 842.6 / 327.2 | 22:2/22:6-PA  | 799.5 / 327.2 | 22:2/22:6-PS  | 886.6 / 327.2 | 22:2/22:6-PC  | 944.6 / 327.2 |
| 22:1/22:6-PG  | 875.6 / 327.2 | 22:1/22:6-PI  | 963.6 / 327.2 | 22:1/22:6-PE  | 844.6 / 327.2 | 22:1/22:6-PA  | 801.6 / 327.2 | 22:1/22:6-PS  | 888.6 / 327.2 | 22:1/22:6-PC  | 946.6 / 327.2 |
| 22:0/22:6-PG  | 877.6 / 327.2 | 22:0/22:6-PI  | 965.6 / 327.2 | 22:0/22:6-PE  | 846.6 / 327.2 | 22:0/22:6-PA  | 803.6 / 327.2 | 22:0/22:6-PS  | 890.6 / 327.2 | 22:0/22:6-PC  | 948.7 / 327.2 |

## Supplementary table 1c. MRM transitions monitored for DPA-containing phospholipids

|               |               |               |               |               |               |               |               |               |               |               |               |
|---------------|---------------|---------------|---------------|---------------|---------------|---------------|---------------|---------------|---------------|---------------|---------------|
| 14:1/22:5-PG  | 765.5 / 329.2 | 14:1/22:5-PI  | 853.5 / 329.2 | 14:1/22:5-PE  | 734.5 / 329.2 | 14:1/22:5-PA  | 691.4 / 329.2 | 14:1/22:5-PS  | 778.5 / 329.2 | 14:1/22:5-PC  | 836.5 / 329.2 |
| 14:0/22:5-PG  | 767.5 / 329.2 | 14:0/22:5-PI  | 855.5 / 329.2 | 14:0/22:5-PE  | 736.5 / 329.2 | 14:0/22:5-PA  | 693.4 / 329.2 | 14:0/22:5-PS  | 780.5 / 329.2 | 14:0/22:5-PC  | 838.5 / 329.2 |
| 16:0p/22:5-PG | 779.5 / 329.2 | 16:0p/22:5-PI | 867.5 / 329.2 | 16:0p/22:5-PE | 748.5 / 329.2 | 16:0p/22:5-PA | 705.5 / 329.2 | 16:0p/22:5-PS | 792.5 / 329.2 | 16:0p/22:5-PC | 850.6 / 329.2 |
| 16:0e/22:5-PG | 781.5 / 329.2 | 16:0e/22:5-PI | 869.5 / 329.2 | 16:0e/22:5-PE | 750.5 / 329.2 | 16:0e/22:5-PA | 707.5 / 329.2 | 16:0e/22:5-PS | 794.5 / 329.2 | 16:0e/22:5-PC | 852.6 / 329.2 |
| 16:1/22:5-PG  | 793.5 / 329.2 | 16:1/22:5-PI  | 881.5 / 329.2 | 16:1/22:5-PE  | 762.5 / 329.2 | 16:1/22:5-PA  | 719.5 / 329.2 | 16:1/22:5-PS  | 806.5 / 329.2 | 16:1/22:5-PC  | 864.5 / 329.2 |
| 16:0/22:5-PG  | 795.5 / 329.2 | 16:0/22:5-PI  | 883.5 / 329.2 | 16:0/22:5-PE  | 764.5 / 329.2 | 16:0/22:5-PA  | 721.5 / 329.2 | 16:0/22:5-PS  | 808.5 / 329.2 | 16:0/22:5-PC  | 866.6 / 329.2 |
| 18:1p/22:5-PG | 805.5 / 329.2 | 18:1p/22:5-PI | 893.5 / 329.2 | 18:1p/22:5-PE | 774.5 / 329.2 | 18:1p/22:5-PA | 731.5 / 329.2 | 18:1p/22:5-PS | 818.5 / 329.2 | 18:1p/22:5-PC | 876.6 / 329.2 |
| 18:0p/22:5-PG | 807.5 / 329.2 | 18:0p/22:5-PI | 895.5 / 329.2 | 18:0p/22:5-PE | 776.6 / 329.2 | 18:0p/22:5-PA | 733.5 / 329.2 | 18:0p/22:5-PS | 820.5 / 329.2 | 18:0p/22:5-PC | 878.6 / 329.2 |
| 18:0e/22:5-PG | 809.5 / 329.2 | 18:0e/22:5-PI | 897.6 / 329.2 | 18:0e/22:5-PE | 778.6 / 329.2 | 18:0e/22:5-PA | 735.5 / 329.2 | 18:0e/22:5-PS | 822.6 / 329.2 | 18:0e/22:5-PC | 880.6 / 329.2 |
| 18:3/22:5-PG  | 817.5 / 329.2 | 18:3/22:5-PI  | 905.5 / 329.2 | 18:3/22:5-PE  | 786.5 / 329.2 | 18:3/22:5-PA  | 743.5 / 329.2 | 18:3/22:5-PS  | 830.5 / 329.2 | 18:3/22:5-PC  | 888.5 / 329.2 |
| 18:2/22:5-PG  | 819.5 / 329.2 | 18:2/22:5-PI  | 907.5 / 329.2 | 18:2/22:5-PE  | 788.5 / 329.2 | 18:2/22:5-PA  | 745.5 / 329.2 | 18:2/22:5-PS  | 832.5 / 329.2 | 18:2/22:5-PC  | 890.6 / 329.2 |
| 18:1/22:5-PG  | 821.5 / 329.2 | 18:1/22:5-PI  | 909.5 / 329.2 | 18:1/22:5-PE  | 790.5 / 329.2 | 18:1/22:5-PA  | 747.5 / 329.2 | 18:1/22:5-PS  | 834.5 / 329.2 | 18:1/22:5-PC  | 892.6 / 329.2 |
| 18:0/22:5-PG  | 823.5 / 329.2 | 18:0/22:5-PI  | 911.5 / 329.2 | 18:0/22:5-PE  | 792.5 / 329.2 | 18:0/22:5-PA  | 749.5 / 329.2 | 18:0/22:5-PS  | 836.5 / 329.2 | 18:0/22:5-PC  | 894.6 / 329.2 |
| 20:0p/22:5-PG | 835.6 / 329.2 | 20:0p/22:5-PI | 923.5 / 329.2 | 20:0p/22:5-PE | 804.6 / 329.2 | 20:0p/22:5-PA | 761.5 / 329.2 | 20:0p/22:5-PS | 848.6 / 329.2 | 20:0p/22:5-PC | 906.6 / 329.2 |
| 20:0e/22:5-PG | 837.6 / 329.2 | 20:0e/22:5-PI | 925.6 / 329.2 | 20:0e/22:5-PE | 806.6 / 329.2 | 20:0e/22:5-PA | 763.6 / 329.2 | 20:0e/22:5-PS | 850.6 / 329.2 | 20:0e/22:5-PC | 908.6 / 329.2 |
| 20:5/22:5-PG  | 841.6 / 329.2 | 20:5/22:5-PI  | 929.5 / 329.2 | 20:5/22:5-PE  | 810.5 / 329.2 | 20:5/22:5-PA  | 767.5 / 329.2 | 20:5/22:5-PS  | 854.5 / 329.2 | 20:5/22:5-PC  | 912.5 / 329.2 |
| 20:4/22:5-PG  | 843.6 / 329.2 | 20:4/22:5-PI  | 931.5 / 329.2 | 20:4/22:5-PE  | 812.5 / 329.2 | 20:4/22:5-PA  | 769.5 / 329.2 | 20:4/22:5-PS  | 856.5 / 329.2 | 20:4/22:5-PC  | 914.6 / 329.2 |
| 20:3/22:5-PG  | 845.6 / 329.2 | 20:3/22:5-PI  | 933.5 / 329.2 | 20:3/22:5-PE  | 814.5 / 329.2 | 20:3/22:5-PA  | 771.5 / 329.2 | 20:3/22:5-PS  | 858.5 / 329.2 | 20:3/22:5-PC  | 916.6 / 329.2 |
| 20:2/22:5-PG  | 847.6 / 329.2 | 20:2/22:5-PI  | 935.6 / 329.2 | 20:2/22:5-PE  | 816.5 / 329.2 | 20:2/22:5-PA  | 773.5 / 329.2 | 20:2/22:5-PS  | 860.5 / 329.2 | 20:2/22:5-PC  | 918.6 / 329.2 |
| 20:1/22:5-PG  | 849.6 / 329.2 | 20:1/22:5-PI  | 937.6 / 329.2 | 20:1/22:5-PE  | 818.6 / 329.2 | 20:1/22:5-PA  | 775.5 / 329.2 | 20:1/22:5-PS  | 862.6 / 329.2 | 20:1/22:5-PC  | 920.6 / 329.2 |
| 20:0/22:5-PG  | 851.6 / 329.2 | 20:0/22:5-PI  | 939.6 / 329.2 | 20:0/22:5-PE  | 820.6 / 329.2 | 20:0/22:5-PA  | 777.5 / 329.2 | 20:0/22:5-PS  | 864.6 / 329.2 | 20:0/22:5-PC  | 922.6 / 329.2 |
| 22:0e/22:5-PG | 865.6 / 329.2 | 22:0e/22:5-PI | 953.5 / 329.2 | 22:0e/22:5-PE | 834.5 / 329.2 | 22:0e/22:5-PA | 791.5 / 329.2 | 22:0e/22:5-PS | 878.5 / 329.2 | 22:0e/22:5-PC | 936.6 / 329.2 |
| 21:0/22:6-PG  | 863.6 / 325.2 | 21:0/22:6-PI  | 951.5 / 325.2 | 21:0/22:6-PE  | 832.5 / 325.2 | 21:0/22:6-PA  | 789.5 / 325.2 | 21:0/22:6-PS  | 876.5 / 325.2 | 21:0/22:6-PC  | 934.6 / 325.2 |
| 22:5/22:5-PG  | 867.6 / 329.2 | 22:5/22:5-PI  | 955.5 / 329.2 | 22:5/22:5-PE  | 836.5 / 329.2 | 22:5/22:5-PA  | 793.5 / 329.2 | 22:5/22:5-PS  | 880.5 / 329.2 | 22:5/22:5-PC  | 938.6 / 329.2 |
| 22:4/22:5-PG  | 871.6 / 329.2 | 22:4/22:5-PI  | 959.6 / 329.2 | 22:4/22:5-PE  | 840.5 / 329.2 | 22:4/22:5-PA  | 797.5 / 329.2 | 22:4/22:5-PS  | 884.5 / 329.2 | 22:4/22:5-PC  | 942.6 / 329.2 |
| 22:2/22:5-PG  | 875.6 / 329.2 | 22:2/22:5-PI  | 963.6 / 329.2 | 22:2/22:5-PE  | 844.6 / 329.2 | 22:2/22:5-PA  | 801.5 / 329.2 | 22:2/22:5-PS  | 888.6 / 329.2 | 22:2/22:5-PC  | 946.6 / 329.2 |
| 22:1/22:5-PG  | 877.6 / 329.2 | 22:1/22:5-PI  | 965.6 / 329.2 | 22:1/22:5-PE  | 846.6 / 329.2 | 22:1/22:5-PA  | 803.6 / 329.2 | 22:1/22:5-PS  | 890.6 / 329.2 | 22:1/22:5-PC  | 948.6 / 329.2 |
| 22:0/22:5-PG  | 879.6 / 329.2 | 22:0/22:5-PI  | 967.6 / 329.2 | 22:0/22:5-PE  | 848.6 / 329.2 | 22:0/22:5-PA  | 805.6 / 329.2 | 22:0/22:5-PS  | 892.6 / 329.2 | 22:0/22:5-PC  | 950.7 / 329.2 |
